# Supplementary material for: Comprehensive Circulatory Metabolomics in ME/CFS Reveals Disrupted Metabolism of Acyl Lipids and Steroids
Source: MDPI journal article supplement (doi:10.3390/metabo10010034), 2020-01-14
Supplement: s1 [file s1]

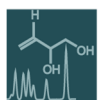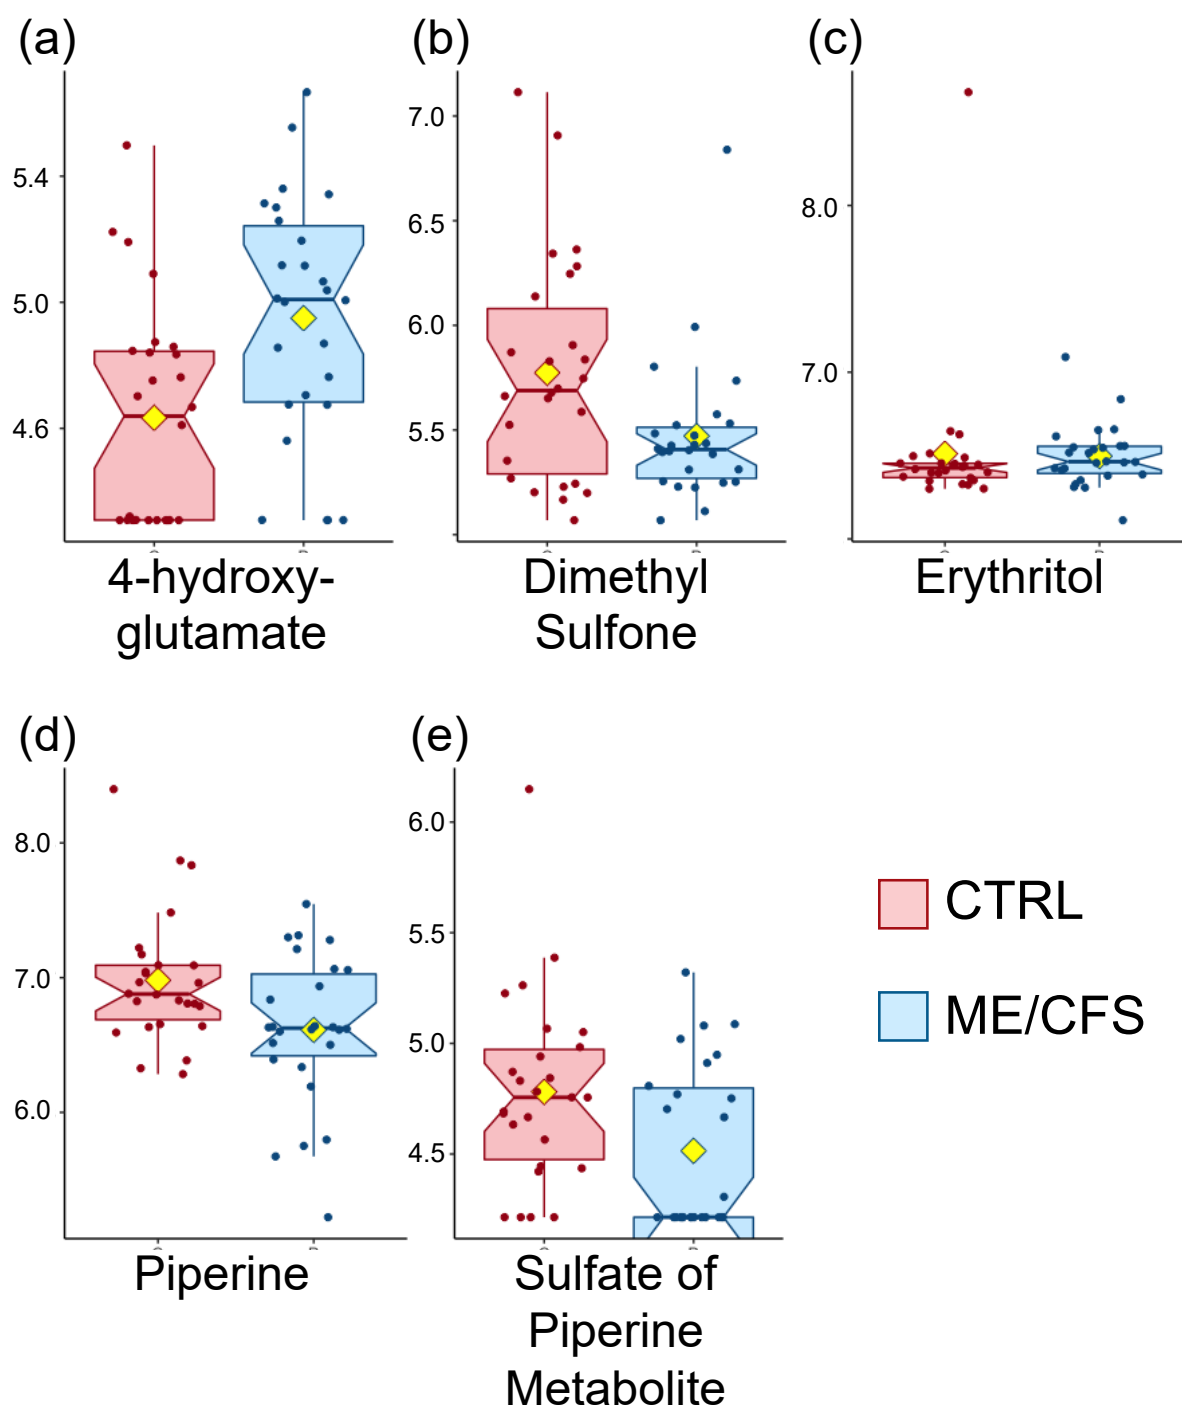

1  
2 Figure S1: Box plot distribution of logged values for the metabolites in Table 2 that  
3 are not part of the Acyl Choline pathway. Controls (CTRL) are shown in red and  
4 patients (ME/CFS) in blue. The yellow diamond represents the mean.

5 Figure S2: ChemRICH sub-pathway-based enrichment plot.

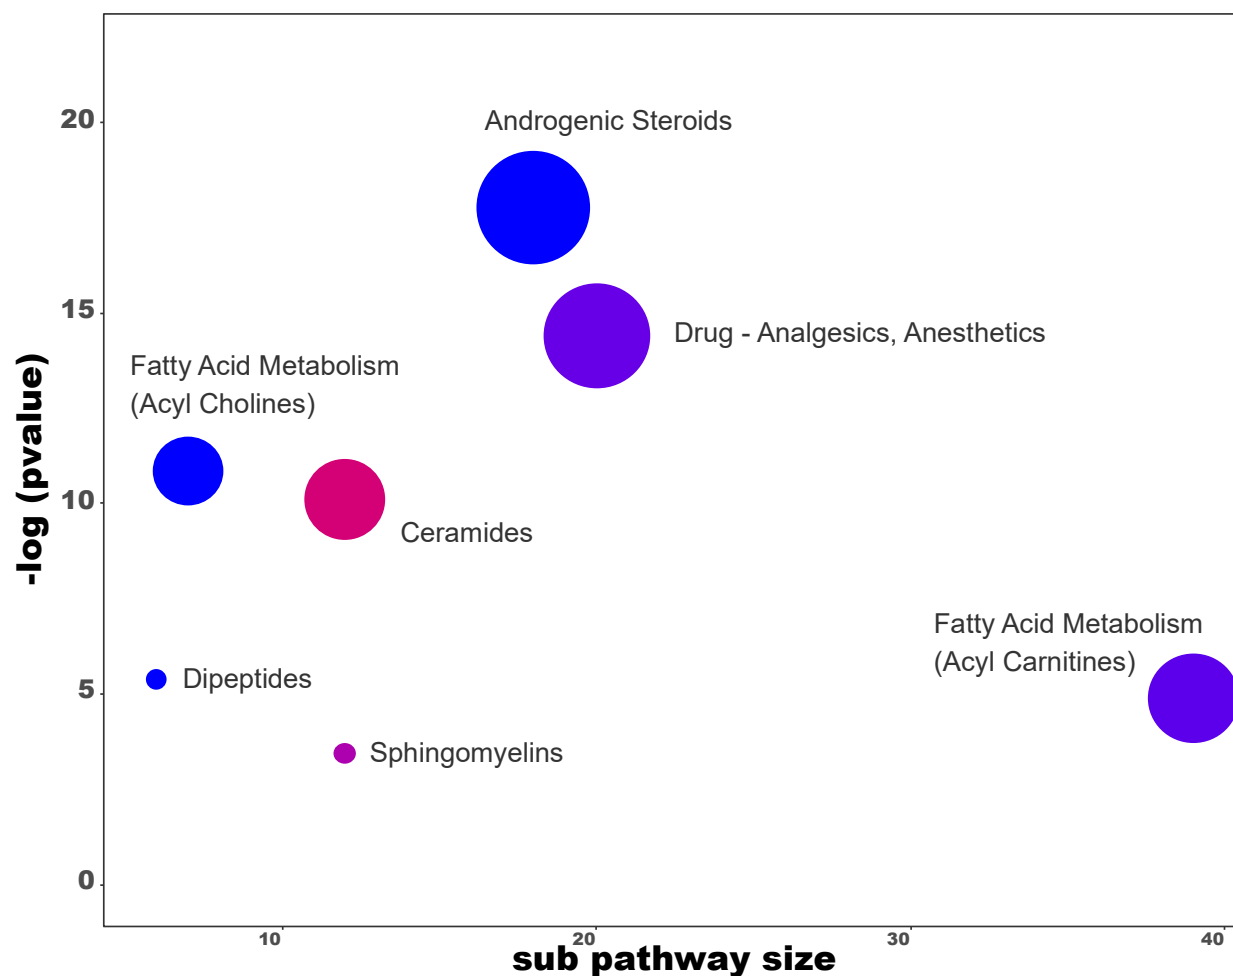

6  
7 Clusters were generated based on Metabolon®'s classification.  
8 Cluster colors give the proportion of increased or decreased compounds (red =  
9 increased, blue = decreased). Enrichment statistics are calculated by Kolmogorov-  
10 Smirnov test.  
11 Enrichment clusters with significant differences at  $p < 0.05$  are shown.

Figure S3: Display of the fold change (controls/patients) of the median, averaged for each of 89 sub-pathways from Germain et al. (2018).

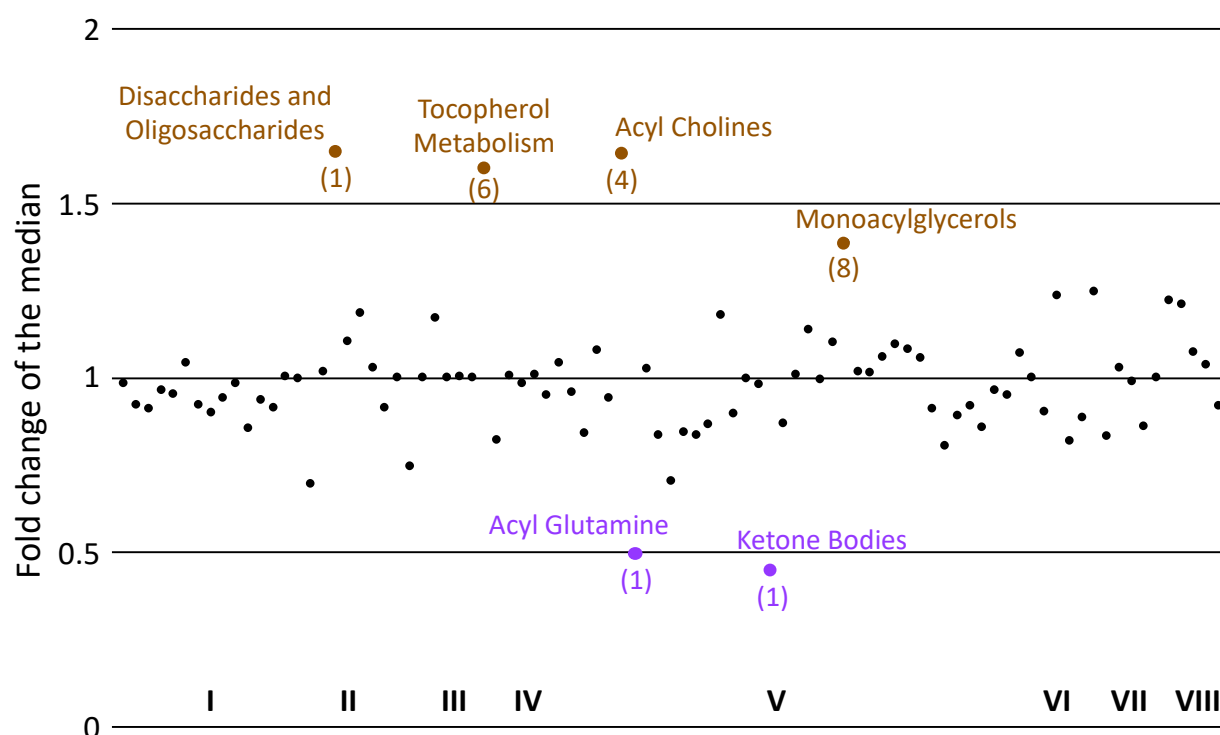

Roman numbers at the bottom of the figure are assigned as follow for each of the nine super-pathways: I = Amino Acids, II = Carbohydrates, III = Cofactors and Vitamins, IV = Energy, V = Lipids, VI = Nucleotides, VII = Peptides and VIII = Xenobiotics. Labelled sub-pathways are discussed in the manuscript; brown ones are over-abundant in controls compared to patients while purple ones are the opposite. The number associated with each sub-pathway reflects the number of metabolites included. Omitted from the graph are the Drug sub-pathways as well as the Tobacco Metabolites, all classified as Xenobiotics.

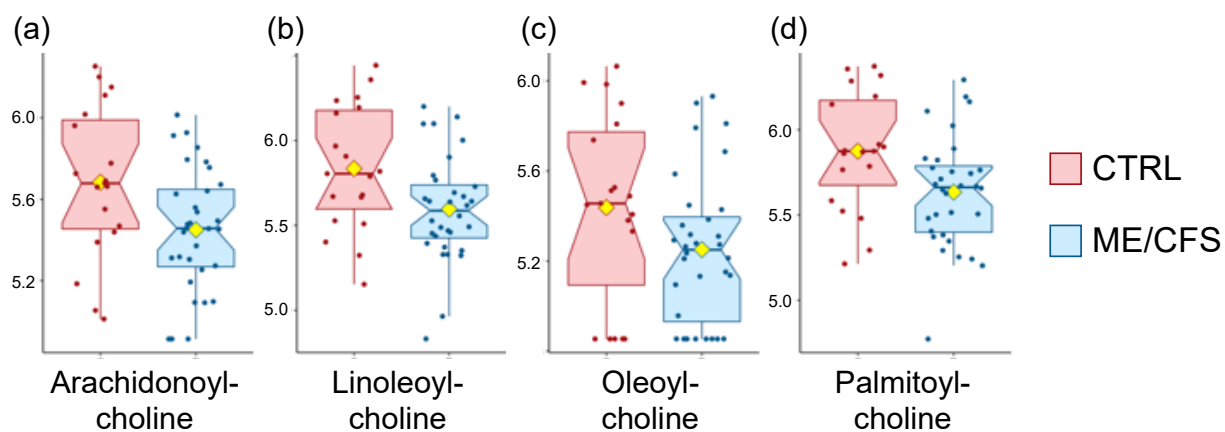

Figure S4: Box plot distribution of logged values for the metabolites that are part of the Acyl Choline pathway from Germain et al. (2018). Controls (CTRL) are shown in red and patients (ME/CFS) in blue. The yellow diamond represents the mean.

Table S1: List of metabolites found to be significantly different between controls and patients after Wilcoxon rank-sum testing with a  $p$ -value cutoff of 0.05.

| Super-pathway                               | Sub-pathway                                      | Metabolite                                       | HMDB ID                | Fold change | p-value |
|---------------------------------------------|--------------------------------------------------|--------------------------------------------------|------------------------|-------------|---------|
| Amino Acids                                 | Alanine and Aspartate Metabolism                 | N-carbamoylalanine                               | NA                     | 0.6         | 0.049   |
|                                             | Glutamate Metabolism                             | 4-hydroxyglutamate                               | HMDB01344              | 0.5         | 0.004   |
|                                             | Glutathione Metabolism                           | Cysteinylglycine                                 | HMDB00078              | 1           | 0.008   |
|                                             | Histidine Metabolism                             | N-acetyl-1-methylhistidine*                      | NA                     | 0.7         | 0.038   |
|                                             | Methionine, Cysteine, SAM and Taurine Metabolism | Hypotaurine                                      | HMDB00965              | 1.3         | 0.039   |
|                                             | Tryptophan Metabolism                            | Indolelactate                                    | HMDB00671              | 1.3         | 0.006   |
|                                             |                                                  | Tryptophan betaine                               | HMDB61115              | 1.7         | 0.035   |
| Urea cycle; Arginine and Proline Metabolism |                                                  | N,N,N-trimethyl-alanylproline betaine (TMAP)     | NA                     | 0.9         | 0.039   |
| Lipids                                      | Androgenic Steroids                              | Dehydroepiandrosterone sulfate (DHEA-S)          | HMDB01032              | 1.5         | 0.035   |
|                                             |                                                  | Epandrosterone sulfate                           | NA                     | 1.8         | 0.035   |
|                                             |                                                  | Androstenediol (3alpha, 17alpha) monosulfate (2) | NA                     | 1.3         | 0.039   |
|                                             |                                                  | 5alpha-androstan-3beta,17alpha-diol disulfate    | NA                     | 1.7         | 0.04    |
|                                             |                                                  | Androsterone sulfate                             | HMDB02759              | 1.6         | 0.041   |
|                                             |                                                  | Androstenediol (3beta,17beta) disulfate (2)      | HMDB03818              | 1.3         | 0.044   |
|                                             |                                                  | Etiocolanolone glucuronide                       | HMDB04484              | 1.8         | 0.049   |
|                                             | Corticosteroids                                  | Cortisone                                        | HMDB02802              | 1.3         | 0.004   |
|                                             |                                                  | Cortisol                                         | HMDB00063              | 1.3         | 0.02    |
|                                             | Fatty Acid Metabolism (Acyl Choline)             | Dihomo-linolenoyl-choline                        | NA                     | 2.3         | 0.019   |
|                                             |                                                  | Linoleoylcholine*                                | NA                     | 2.2         | 0.036   |
|                                             |                                                  | Stearoylcholine*                                 | NA                     | 2.2         | 0.043   |
|                                             | Fatty Acid Metabolism(Acyl Carnitine)            | Arachidoylcarnitine (C20)*                       | HMDB06460              | 0.7         | 0.025   |
|                                             |                                                  | Docosahexaenoylcarnitine (C22:6)*                | NA                     | 1.3         | 0.025   |
|                                             |                                                  | Adrenoylcarnitine (C22:4)*                       | NA                     | 1.3         | 0.029   |
|                                             |                                                  | Octanoylcarnitine (C8)                           | HMDB00791              | 1.3         | 0.035   |
|                                             |                                                  | Adipoylcarnitine (C6-DC)                         | HMDB61677              | 0.8         | 0.042   |
|                                             |                                                  | Decanoylcarnitine (C10)                          | HMDB00651              | 1.4         | 0.049   |
| Fatty Acid, Dicarboxylate                   |                                                  | Branched chain 14:0 dicarboxylic acid**          | NA                     | 1.5         | 0.049   |
| Fatty Acid, Monohydroxy                     | 3-hydroxymyristate                               | NA                                               | 1.4                    | 0.013       |         |
|                                             | 3-hydroxydecanoate                               | HMDB02203                                        | 1.5                    | 0.015       |         |
|                                             | 3-hydroxylaurate                                 | HMDB00387                                        | 1.5                    | 0.029       |         |
|                                             | Medium Chain Fatty Acid                          | Cis-4-decenoate (10:1n6)*                        | NA                     | 1.5         | 0.047   |
| Secondary Bile Acid Metabolism              |                                                  | Glycohyocholate                                  | NA                     | 0.7         | 0.048   |
| Short Chain Fatty Acid                      |                                                  | Valerate (5:0)                                   | HMDB00892              | 1.4         | 0.045   |
| Peptides                                    | Dipeptide                                        | Phenylalanylalanine                              | HMDB028988             | 1.3         | 0.007   |
|                                             |                                                  | Phenylalanylglycine                              | HMDB28995              | 1.3         | 0.014   |
|                                             |                                                  | Valylleucine                                     | HMDB29131              | 1.5         | 0.046   |
|                                             | Gamma-glutamyl Amino Acid                        |                                                  | Gamma-glutamyltyrosine | HMDB11741   | 0.8     |
| Xenobiotics                                 | Chemical                                         | Dimethyl sulfone                                 | HMDB04983              | 2.7         | 0.032   |
|                                             |                                                  | Piperine                                         | HMDB29377              | 3           | 0.027   |
|                                             | Food Component/Plant                             | Sulfate of piperine metabolite C16H19NO3 (3)*    | NA                     | 2.5         | 0.027   |
|                                             |                                                  | Stachydrine                                      | HMDB04827              | 1.6         | 0.044   |

HMDB stands for Human Metabolome Database. NA stands for Not Assigned.

Fold change represents controls/patients and red highlights the eight compounds that have a higher abundance in patients compared to controls.

Table S2: List of metabolites with a fold change (controls/patients) threshold of 2.

| Super-pathway          | Sub-pathway                                | Metabolite                                    | HMDB ID   | Fold change |
|------------------------|--------------------------------------------|-----------------------------------------------|-----------|-------------|
| Amino Acids            | Glutamate Metabolism                       | 4-hydroxyglutamate                            | HMDB01344 | 0.5         |
|                        | Glycine, Serine and Threonine Metabolism   | O-acetylhomoserine                            | NA        | 3.1         |
|                        | Tryptophan Metabolism                      | Picolinate                                    | HMDB02243 | 2.7         |
| Carbohydrates          | Fructose, Mannose and Galactose Metabolism | Galactonate                                   | HMDB00565 | 0.5         |
| Cofactors and Vitamins | Vitamin B6 Metabolism                      | Pyridoxate                                    | HMDB00017 | 3.1         |
| Lipids                 | Fatty Acid Metabolism (Acyl Choline)       | Oleoylcholine                                 | NA        | 2.3         |
|                        |                                            | Dihomo-linolenoyl-choline                     | NA        | 2.3         |
|                        |                                            | Linoleoylcholine                              | NA        | 2.2         |
|                        |                                            | Stearoylcholine                               | NA        | 2.2         |
|                        |                                            | Palmitoylcholine                              | NA        | 2.1         |
|                        | Primary Bile Acid Metabolism               | Cholate                                       | HMDB00619 | 3.1         |
|                        | Fibrinogen Cleavage Peptide                | Fibrinopeptide B (1-11)**                     | NA        | 3.9         |
| Peptides               |                                            | Fibrinopeptide A (2-15)**                     | NA        | 2.5         |
| Xenobiotics            | Benzoate Metabolism                        | 3-(3-hydroxyphenyl)propionate                 | HMDB00375 | 0.4         |
|                        |                                            | 2-hydroxyhippurate (salicylurate)             | HMDB00840 | 2.3         |
|                        |                                            | 3-hydroxyhippurate                            | HMDB06116 | 0.5         |
|                        | Chemical                                   | 4-methylbenzenesulfonate                      | NA        | 58          |
|                        |                                            | Dimethyl sulfone                              | HMDB04983 | 2.7         |
|                        | Drug - Analgesics, Anesthetics             | Ibuprofen                                     | HMDB01925 | 0.1         |
|                        | Food Component/Plant                       | Erythritol                                    | HMDB02994 | 6           |
|                        |                                            | Thymol sulfate                                | HMDB01878 | 4.4         |
|                        |                                            | Piperine                                      | HMDB29377 | 3           |
|                        |                                            | Eugenol sulfate                               | NA        | 2.8         |
|                        |                                            | S-allylcysteine                               | HMDB34323 | 2.6         |
|                        |                                            | Sulfate of piperine metabolite C16H19NO3 (3)* | NA        | 2.5         |

HMDB stands for Human Metabolome Database. NA stands for Not Assigned.

Fold changes in red lettering highlight the five compounds that have a higher abundance in patients compared to controls.

Table S3: List of metabolites found to be significantly different between controls and patients after Wilcoxon rank-sum testing on super-pathway dichotomized datasets, with a  $q$ -value cutoff at 0.15.

| Super-pathway | Sub-pathway | Metabolite          | HMDB ID    | $p$ -value | $q$ -value | Fold change |
|---------------|-------------|---------------------|------------|------------|------------|-------------|
| Peptides      | Dipeptides  | Leucylglycine       | HMDB28929  | 0.003      | 0.1        | 2           |
|               |             | Phenylalanylalanine | HMDB028988 | 0.007      | 0.11       | 1.3         |
|               |             | Phenylalanylglycine | HMDB28995  | 0.01       | 0.15       | 1.3         |

HMDB stands for Human Metabolome Database.

Fold change of mean represents controls/patients.

Table S4: Results of the pathway enrichment analysis on the global metabolomics dataset.

| Pathway name                                        | Match status | p-value | q-value | Impact score |
|-----------------------------------------------------|--------------|---------|---------|--------------|
| Glutathione metabolism                              | 3/38         | 0.01    | 0.34    | 0.01         |
| Steroid hormone biosynthesis                        | 8/99         | 0.01    | 0.34    | 0.08         |
| Propanoate metabolism                               | 3/35         | 0.04    | 0.50    | 0.03         |
| Terpenoid backbone biosynthesis                     | 1/33         | 0.07    | 0.50    | 0            |
| Pentose phosphate pathway                           | 3/32         | 0.07    | 0.50    | 0.11         |
| Ascorbate and aldarate metabolism                   | 5/45         | 0.07    | 0.50    | 0.06         |
| Glycine, serine and threonine metabolism            | 9/48         | 0.08    | 0.50    | 0.06         |
| Glycolysis or Gluconeogenesis                       | 2/31         | 0.08    | 0.50    | 0.10         |
| Inositol phosphate metabolism                       | 2/39         | 0.08    | 0.50    | 0.14         |
| Vitamin B6 metabolism                               | 2/32         | 0.08    | 0.50    | 0.08         |
| D-Glutamine and D-glutamate metabolism              | 1/11         | 0.10    | 0.57    | 0.11         |
| Alanine, aspartate and glutamate metabolism         | 3/24         | 0.11    | 0.58    | 0.44         |
| Valine, leucine and isoleucine biosynthesis         | 7/27         | 0.15    | 0.61    | 0.26         |
| Pentose and glucuronate interconversions            | 6/53         | 0.16    | 0.61    | 0.12         |
| Pyruvate metabolism                                 | 4/32         | 0.18    | 0.61    | 0.32         |
| Citrate cycle (TCA cycle)                           | 2/20         | 0.19    | 0.61    | 0.13         |
| Arachidonic acid metabolism                         | 1/62         | 0.19    | 0.61    | 0.22         |
| Butanoate metabolism                                | 4/40         | 0.21    | 0.61    | 0.11         |
| Taurine and hypotaurine metabolism                  | 6/20         | 0.21    | 0.61    | 0.51         |
| Cysteine and methionine metabolism                  | 11/56        | 0.21    | 0.61    | 0.36         |
| Lysine biosynthesis                                 | 2/32         | 0.22    | 0.61    | 0.07         |
| Amino sugar and nucleotide sugar metabolism         | 5/88         | 0.23    | 0.61    | 0.01         |
| Fructose and mannose metabolism                     | 1/48         | 0.24    | 0.61    | 0.01         |
| Glyoxylate and dicarboxylate metabolism             | 5/50         | 0.25    | 0.61    | 0.20         |
| Sphingolipid metabolism                             | 4/25         | 0.25    | 0.61    | 0.26         |
| Tryptophan metabolism                               | 7/79         | 0.26    | 0.61    | 0.15         |
| Porphyrin and chlorophyll metabolism                | 4/104        | 0.29    | 0.65    | 0.06         |
| Arginine and proline metabolism                     | 14/77        | 0.34    | 0.73    | 0.36         |
| Starch and sucrose metabolism                       | 6/50         | 0.35    | 0.73    | 0.11         |
| Histidine metabolism                                | 10/44        | 0.36    | 0.73    | 0.15         |
| Ether lipid metabolism                              | 2/23         | 0.40    | 0.75    | 0            |
| Nicotinate and nicotinamide metabolism              | 10/44        | 0.42    | 0.75    | 0.09         |
| Pantothenate and CoA biosynthesis                   | 7/27         | 0.44    | 0.75    | 0.24         |
| Lysine degradation                                  | 7/47         | 0.45    | 0.75    | 0.12         |
| Phenylalanine metabolism                            | 12/45        | 0.45    | 0.75    | 0.19         |
| alpha-Linolenic acid metabolism                     | 1/29         | 0.45    | 0.75    | 0            |
| Primary bile acid biosynthesis                      | 8/47         | 0.45    | 0.75    | 0.10         |
| Glycerophospholipid metabolism                      | 7/39         | 0.47    | 0.75    | 0.31         |
| Nitrogen metabolism                                 | 6/39         | 0.55    | 0.83    | 0            |
| Purine metabolism                                   | 5/92         | 0.55    | 0.83    | 0.14         |
| Cyanoamino acid metabolism                          | 1/16         | 0.58    | 0.83    | 0            |
| Fatty acid elongation in mitochondria               | 1/27         | 0.58    | 0.83    | 0            |
| beta-Alanine metabolism                             | 5/28         | 0.59    | 0.83    | 0.07         |
| Galactose metabolism                                | 6/41         | 0.65    | 0.88    | 0.10         |
| Methane metabolism                                  | 1/34         | 0.68    | 0.88    | 0            |
| Aminoacyl-tRNA biosynthesis                         | 6/75         | 0.68    | 0.88    | 0.11         |
| D-Arginine and D-ornithine metabolism               | 2/8          | 0.68    | 0.88    | 0            |
| Tyrosine metabolism                                 | 9/76         | 0.70    | 0.89    | 0.22         |
| Pyrimidine metabolism                               | 10/60        | 0.73    | 0.91    | 0.21         |
| Retinol metabolism                                  | 2/22         | 0.75    | 0.91    | 0.35         |
| Ubiquinone and other terpenoid-quinone biosynthesis | 3/36         | 0.77    | 0.91    | 0.09         |
| Caffeine metabolism                                 | 10/21        | 0.79    | 0.91    | 0.64         |
| Valine, leucine and isoleucine degradation          | 3/40         | 0.80    | 0.91    | 0.06         |
| Linoleic acid metabolism                            | 4/15         | 0.82    | 0.91    | 0.66         |
| Phenylalanine, tyrosine and tryptophan biosynthesis | 3/27         | 0.83    | 0.91    | 0.01         |
| Fatty acid metabolism                               | 2/50         | 0.85    | 0.91    | 0.03         |
| Glycerolipid metabolism                             | 4/32         | 0.87    | 0.91    | 0.23         |
| Fatty acid biosynthesis                             | 6/49         | 0.87    | 0.91    | 0            |
| Riboflavin metabolism                               | 3/21         | 0.88    | 0.91    | 0.25         |
| Synthesis and degradation of ketone bodies          | 1/6          | 0.94    | 0.95    | 0            |
| Thiamine metabolism                                 | 1/24         | 0.97    | 0.97    | 0            |

Match status represents the number of hits compared to the number of metabolites in the selected pathway, while the impact score indicates the pathway impact on the health of the subjects based the affected metabolites within the pathway as well as the abundance differences between controls and patients.



Table S5: Results of the pathway enrichment analysis on the complex lipid dataset.

| Pathway name                          | Match status | <i>p</i> -value | <i>q</i> -value | Impact score |
|---------------------------------------|--------------|-----------------|-----------------|--------------|
| Sphingolipid metabolism               | 4/25         | 0.03            | 0.23            | 0.34         |
| Fatty acid metabolism                 | 1/50         | 0.19            | 0.52            | 0.03         |
| Fatty acid elongation in mitochondria | 1/27         | 0.19            | 0.52            | 0.00         |
| Fatty acid biosynthesis               | 6/49         | 0.65            | 0.87            | 0.00         |
| alpha-Linolenic acid metabolism       | 2/29         | 0.65            | 0.87            | 0.00         |
| Arachidonic acid metabolism           | 2/62         | 0.79            | 0.87            | 0.22         |
| Linoleic acid metabolism              | 2/15         | 0.86            | 0.87            | 0.66         |
| Glycerophospholipid metabolism        | 2/39         | 0.87            | 0.87            | 0.10         |

Match status represents the number of hits compared to the number of metabolites in the selected pathway, while the impact score indicates the pathway impact on the health of the subjects based the affected metabolites within the pathway as well as the abundance differences between controls and patients.

56 Table S6: ChemRICH output for the Global Metabolomics panel analysis.

| Cluster name                 | Cluster size | p-value | q-value | Key compound                                | Altered metabolites | Increased | Decreased | Increased ratio | Altered ratio |
|------------------------------|--------------|---------|---------|---------------------------------------------|---------------------|-----------|-----------|-----------------|---------------|
| Dipeptides                   | 52           | 0.025   | 1       | 4-hydroxyglutamate                          | 9                   | 6         | 3         | 0.7             | 0.2           |
| NewCluster_12                | 6            | 0.057   | 1       | arachidoylcarnitine (C20)*                  | 3                   | 1         | 2         | 0.3             | 0.5           |
| Indoles                      | 7            | 0.15    | 1       | indolelactate                               | 2                   | 2         | 0         | 1               | 0.3           |
| Pipecolic Acids              | 5            | 0.21    | 1       | C-glycosyltryptophan                        | 2                   | 1         | 1         | 0.5             | 0.4           |
| Pyrrolidinones               | 11           | 0.22    | 1       | cotinine                                    | 2                   | 2         | 0         | 1               | 0.2           |
| Unsaturated FA               | 26           | 0.34    | 1       | 3-(cystein-S-yl)acetaminophen*              | 2                   | 1         | 0         | 0.5             | 0.08          |
| Xanthines                    | 15           | 0.74    | 1       | leucylglycine                               | 2                   | 2         | 0         | 1               | 0.1           |
| 4-Hydroxycoumarins           | 3            | 1       | 1       | nonanoylcarnitine (C9)                      | 0                   | 0         | 0         | ND              | 0             |
| Acetanilides                 | 8            | 1       | 1       | 4-acetaminophen sulfate                     | 0                   | 0         | 0         | ND              | 0             |
| Adenosine                    | 4            | 1       | 1       | 5-methylthioadenosine (MTA)                 | 0                   | 0         | 0         | ND              | 0             |
| Adipates                     | 5            | 1       | 1       | threonate                                   | 0                   | 0         | 0         | ND              | 0             |
| Amino Acids                  | 12           | 1       | 1       | 5,6-dihydrothymine                          | 0                   | 0         | 0         | ND              | 0             |
| Amino Acids, Aromatic        | 6            | 1       | 1       | phenylalanine                               | 0                   | 0         | 0         | ND              | 0             |
| Amino Acids, Basic           | 11           | 1       | 1       | dimethyl sulfone                            | 1                   | 1         | 0         | 1               | 0.09          |
| Amino Acids, Branched-Chain  | 4            | 1       | 1       | 4-methylbenzenesulfonate                    | 0                   | 0         | 0         | ND              | 0             |
| Amino Acids, Diamino         | 4            | 1       | 1       | 2-hydroxyphytate*                           | 0                   | 0         | 0         | ND              | 0             |
| Amino Acids, Sulfur          | 5            | 1       | 1       | N-acetylarginine                            | 0                   | 0         | 0         | ND              | 0             |
| Androst-enols                | 4            | 1       | 1       | 3-methylglutarate/2-methylglutarate         | 0                   | 0         | 0         | ND              | 0             |
| Anisoles                     | 4            | 1       | 1       | phenylacetyl carnitine                      | 0                   | 0         | 0         | ND              | 0             |
| Arachidonic Acids            | 3            | 1       | 1       | arachidonate (20:4n6)                       | 0                   | 0         | 0         | ND              | 0             |
| Bile Pigments                | 4            | 1       | 1       | 3-amino-2-piperidone                        | 0                   | 0         | 0         | ND              | 0             |
| Butyrates                    | 9            | 1       | 1       | alpha-ketobutyrate                          | 0                   | 0         | 0         | ND              | 0             |
| Caproates                    | 7            | 1       | 1       | 3beta-hydroxy-5-cholestenoate               | 0                   | 0         | 0         | ND              | 0             |
| Carnitine                    | 19           | 1       | 1       | oleoylcholine                               | 1                   | 1         | 0         | 1               | 0.05          |
| Chenodeoxycholic Acid        | 3            | 1       | 1       | glycochenodeoxycholate                      | 0                   | 0         | 0         | ND              | 0             |
| Cholestenones                | 5            | 1       | 1       | 4-cholesten-3-one                           | 0                   | 0         | 0         | ND              | 0             |
| Cholic Acids                 | 8            | 1       | 1       | phenylacetylglutamine                       | 0                   | 0         | 0         | ND              | 0             |
| Cinnamates                   | 5            | 1       | 1       | 4-ethylphenylsulfate                        | 0                   | 0         | 0         | ND              | 0             |
| Cresols                      | 7            | 1       | 1       | p-cresol glucuronide*                       | 0                   | 0         | 0         | ND              | 0             |
| Deoxycholic Acid             | 5            | 1       | 1       | alpha-hydroxymetoprolol                     | 1                   | 0         | 1         | 0               | 0.2           |
| Dicarboxylic Acids           | 7            | 1       | 1       | tartronate (hydroxymalonate)                | 0                   | 0         | 0         | ND              | 0             |
| Ethanolamines                | 4            | 1       | 1       | phosphoethanolamine                         | 0                   | 0         | 0         | ND              | 0             |
| Fluorocarbons                | 3            | 1       | 1       | perfluorooctanoate (PFOA)                   | 0                   | 0         | 0         | ND              | 0             |
| Glucanates                   | 4            | 1       | 1       | glucuronate                                 | 0                   | 0         | 0         | ND              | 0             |
| Glucuronates                 | 4            | 1       | 1       | palmitoylcholine                            | 0                   | 0         | 0         | ND              | 0             |
| Glutamates                   | 7            | 1       | 1       | glutamate                                   | 0                   | 0         | 0         | ND              | 0             |
| Glutarates                   | 13           | 1       | 1       | 4-hydroxy-2-oxoglutaric acid                | 0                   | 0         | 0         | ND              | 0             |
| Glycerophospholipids         | 3            | 1       | 1       | glycerophosphoethanolamine                  | 0                   | 0         | 0         | ND              | 0             |
| Guanidines                   | 5            | 1       | 1       | androsterone sulfate                        | 1                   | 1         | 0         | 1               | 0.2           |
| Hexoses                      | 3            | 1       | 1       | glucose                                     | 0                   | 0         | 0         | ND              | 0             |
| Hippurates                   | 4            | 1       | 1       | hippurate                                   | 0                   | 0         | 0         | ND              | 0             |
| Hydroquinones                | 4            | 1       | 1       | 5-dodecenoylcarnitine (C12:1)               | 0                   | 0         | 0         | ND              | 0             |
| Hydroxybenzoates             | 3            | 1       | 1       | salicylate                                  | 0                   | 0         | 0         | ND              | 0             |
| Hydroxyproline               | 4            | 1       | 1       | androsterone glucuronide                    | 0                   | 0         | 0         | ND              | 0             |
| Imidazoles                   | 9            | 1       | 1       | 1-methyl-4-imidazoleacetate                 | 0                   | 0         | 0         | ND              | 0             |
| Imino Acids                  | 3            | 1       | 1       | 21-hydroxypregnenolone disulfate            | 0                   | 0         | 0         | ND              | 0             |
| Keto Acids                   | 3            | 1       | 1       | 4-methyl-2-oxopentanoate                    | 0                   | 0         | 0         | ND              | 0             |
| Lauric Acids                 | 3            | 1       | 1       | decanoylcarnitine (C10)                     | 1                   | 1         | 0         | 1               | 0.3           |
| Lysophospholipids            | 4            | 1       | 1       | 2-methoxyacetaminophen glucuronide*         | 1                   | 1         | 0         | 1               | 0.2           |
| Malates                      | 3            | 1       | 1       | 2-isopropylmalate                           | 0                   | 0         | 0         | ND              | 0             |
| Malonates                    | 3            | 1       | 1       | methylmalonate (MMA)                        | 0                   | 0         | 0         | ND              | 0             |
| Methionine                   | 5            | 1       | 1       | bromine                                     | 0                   | 0         | 0         | ND              | 0             |
| Methylhistidines             | 4            | 1       | 1       | N-acetyl-1-methylhistidine*                 | 1                   | 0         | 1         | 0               | 0.2           |
| Naphthalenes                 | 3            | 1       | 1       | nisinate (24:6n3)                           | 0                   | 0         | 0         | ND              | 0             |
| O=FA_20_1                    | 3            | 1       | 1       | suberate (C8-DC)                            | 0                   | 0         | 0         | ND              | 0             |
| O=FA_9_1                     | 5            | 1       | 1       | dehydroepiandrosterone sulfate (DHEA-S)     | 1                   | 1         | 0         | 1               | 0.2           |
| OH-FA_14_0_1                 | 6            | 1       | 1       | N-ethylglycinexylidide                      | 0                   | 0         | 0         | ND              | 0             |
| OH-FA_22_0_1                 | 5            | 1       | 1       | 7-methylurate                               | 0                   | 0         | 0         | ND              | 0             |
| OH-FA_8_0_1                  | 3            | 1       | 1       | 4-acetamidobutanoate                        | 0                   | 0         | 0         | ND              | 0             |
| Oleic Acids                  | 3            | 1       | 1       | oleoyl ethanolamide                         | 0                   | 0         | 0         | ND              | 0             |
| Pentanoic Acids              | 7            | 1       | 1       | valerate (5:0)                              | 1                   | 1         | 0         | 1               | 0.1           |
| Pentoses                     | 4            | 1       | 1       | N-acetyls erine                             | 0                   | 0         | 0         | ND              | 0             |
| Phenoxopropanolamines        | 3            | 1       | 1       | metoprolol                                  | 0                   | 0         | 0         | ND              | 0             |
| Phenylacetates               | 5            | 1       | 1       | 4-acetamidophenylglucuronide                | 0                   | 0         | 0         | ND              | 0             |
| Phenylpropionates            | 3            | 1       | 1       | N2,N5-diacetylornithine                     | 0                   | 0         | 0         | ND              | 0             |
| Phytosterols                 | 4            | 1       | 1       | cortisone                                   | 1                   | 1         | 0         | 1               | 0.2           |
| Pregnenolone                 | 3            | 1       | 1       | pregnenolone sulfate                        | 0                   | 0         | 0         | ND              | 0             |
| Propanolamines               | 3            | 1       | 1       | glycohyocholate                             | 1                   | 0         | 1         | 0               | 0.3           |
| Pyridines                    | 7            | 1       | 1       | nicotinamide                                | 0                   | 0         | 0         | ND              | 0             |
| Pyridones                    | 3            | 1       | 1       | 2-hydroxystearate                           | 0                   | 0         | 0         | ND              | 0             |
| Pyrimidinones                | 6            | 1       | 1       | cytosine                                    | 0                   | 0         | 0         | ND              | 0             |
| Pyrroles                     | 3            | 1       | 1       | stachydrine                                 | 1                   | 1         | 0         | 1               | 0.3           |
| Pyruvates                    | 5            | 1       | 1       | phenyllactate (PLA)                         | 0                   | 0         | 0         | ND              | 0             |
| Quinolines                   | 4            | 1       | 1       | imidazole lactate                           | 0                   | 0         | 0         | ND              | 0             |
| Retinoids                    | 3            | 1       | 1       | glucuronate                                 | 0                   | 0         | 0         | ND              | 0             |
| Saturated_Fatty Acids        | 17           | 1       | 1       | 3-hydroxydecanoate                          | 1                   | 1         | 0         | 1               | 0.06          |
| Saturated_Fatty Acids        | 6            | 1       | 1       | 3-hydroxymyristate                          | 1                   | 1         | 0         | 1               | 0.2           |
| Succinates                   | 6            | 1       | 1       | androstenediol (3beta,17beta) disulfate (2) | 1                   | 1         | 0         | 1               | 0.2           |
| Sugar Acids                  | 8            | 1       | 1       | picolinoylglycine                           | 0                   | 0         | 0         | ND              | 0             |
| Sugar Alcohols               | 5            | 1       | 1       | erythritol                                  | 0                   | 0         | 0         | ND              | 0             |
| Sulfur Compounds             | 4            | 1       | 1       | N-carbamoylalanine                          | 1                   | 0         | 1         | 0               | 0.2           |
| Sulfuric Acid Esters         | 5            | 1       | 1       | leucylglutamine*                            | 0                   | 0         | 0         | ND              | 0             |
| Taurodeoxycholic Acid        | 3            | 1       | 1       | taurochenodeoxycholate                      | 0                   | 0         | 0         | ND              | 0             |
| Thiazoles                    | 3            | 1       | 1       | saccharin                                   | 0                   | 0         | 0         | ND              | 0             |
| Tricarboxylic Acids          | 6            | 1       | 1       | gamma-carboxyglutamate                      | 0                   | 0         | 0         | ND              | 0             |
| Trimethyl Ammonium Compounds | 4            | 1       | 1       | dimethylglycine                             | 0                   | 0         | 0         | ND              | 0             |
| Uridine                      | 7            | 1       | 1       | 10-undecenoate (11:1n1)                     | 0                   | 0         | 0         | ND              | 0             |

57

58 ND stands for Not Determined. Fold change represents controls/patients.

59 Table S7: ChemRICH output for the Dipeptides cluster name.

| Super-pathway | Sub-pathway                      | Metabolite                  | HMDB ID    | Fold change | p-value |
|---------------|----------------------------------|-----------------------------|------------|-------------|---------|
| Amino Acids   | Glutamate Metabolism             | 4-hydroxyglutamate          | HMDB01344  | 0.5         | 0.005   |
|               | Alanine and Aspartate Metabolism | Hydroxyasparagine           | HMDB32332  | 0.8         | 0.007   |
|               | Glutathione Metabolism           | Cysteinylglycine            | HMDB00078  | 1.4         | 0.008   |
| Peptides      | Dipeptides                       | Phenylalanylalanine         | HMDB028988 | 1.3         | 0.007   |
|               |                                  | Phenylalanylglycine         | HMDB28995  | 1.3         | 0.014   |
|               |                                  | Valylleucine                | HMDB29131  | 1.5         | 0.046   |
|               | Gamma-glutamyl Amino Acid        | Gamma-glutamyltyrosine      | HMDB11741  | 0.8         | 0.045   |
| Lipids        | Fatty Acid, Monohydroxy          | 3-hydroxylaurate            | HMDB00387  | 1.5         | 0.029   |
|               | Androgenic Steroids              | Etiocholanolone glucuronide | HMDB04484  | 1.8         | 0.049   |

60 HMDB stands for Human Metabolome Database.

61 Fold change of mean represents controls/patients.

62 Table S8: ChemRICH output for the complex lipid panel analysis.

| Cluster name                          | Cluster size | p-value | q-value | Key compound    | Altered metabolites | Increased | Decreased | Increased ratio | Altered ratio |
|---------------------------------------|--------------|---------|---------|-----------------|---------------------|-----------|-----------|-----------------|---------------|
| Unsaturated_Ceramides                 | 9            | 0.00036 | 0.0072  | CER(18:0)       | 3                   | 0         | 3         | 0               | 0.3           |
| Sphingomyelins                        | 9            | 0.035   | 0.35    | SM(18:1)        | 2                   | 0         | 2         | 0               | 0.2           |
| Cholesterol Esters                    | 21           | 1       | 1       | CE(22:2)        | 1                   | 0         | 1         | 0               | 0.05          |
| Galactosylceramides                   | 8            | 1       | 1       | HCER(20:0)      | 1                   | 0         | 1         | 0               | 0.1           |
| Lactosylceramides                     | 9            | 1       | 1       | LCER(18:0)      | 0                   | 0         | 0         | ND              | 0             |
| NewCluster_4                          | 30           | 1       | 1       | PE(P-18:1/16:0) | 0                   | 0         | 0         | ND              | 0             |
| NewCluster_6                          | 12           | 1       | 1       | LPE(20:1)       | 0                   | 0         | 0         | ND              | 0             |
| Plasmalogens                          | 6            | 1       | 1       | PE(P-18:1/22:6) | 0                   | 0         | 0         | ND              | 0             |
| Saturated_Ceramides                   | 7            | 1       | 1       | DCER(20:0)      | 0                   | 0         | 0         | ND              | 0             |
| Saturated_Diglycerides                | 5            | 1       | 1       | DAG(16:0/18:0)  | 0                   | 0         | 0         | ND              | 0             |
| Saturated FA                          | 9            | 1       | 1       | FFA(24:0)       | 0                   | 0         | 0         | ND              | 0             |
| Saturated_Lysophosphatidylcholines    | 5            | 1       | 1       | LPC(15:0)       | 0                   | 0         | 0         | ND              | 0             |
| Saturated_Lysophospholipids           | 4            | 1       | 1       | LPE(15:0)       | 0                   | 0         | 0         | ND              | 0             |
| Saturated_Phosphatidylcholines        | 7            | 1       | 1       | PC(16:0/14:0)   | 0                   | 0         | 0         | ND              | 0             |
| Saturated_Phosphatidylethanolamines   | 3            | 1       | 1       | PE(16:0/16:0)   | 0                   | 0         | 0         | ND              | 0             |
| Unsaturated_Diglycerides              | 49           | 1       | 1       | DAG(18:1/18:1)  | 0                   | 0         | 0         | ND              | 0             |
| UnSaturated FA                        | 14           | 1       | 1       | FFA(22:4)       | 0                   | 0         | 0         | ND              | 0             |
| Unsaturated_Lysophosphatidylcholines  | 10           | 1       | 1       | LPC(18:3)       | 0                   | 0         | 0         | ND              | 0             |
| Unsaturated_Phosphatidylcholines      | 80           | 1       | 1       | PC(18:2/18:3)   | 1                   | 1         | 0         | 1               | 0.01          |
| Unsaturated_Phosphatidylethanolamines | 49           | 1       | 1       | PE(18:1/14:1)   | 0                   | 0         | 0         | ND              | 0             |

63

64 ND stands for Not Determined. Fold change represents controls/patients.

65 Table S9: Detailed ChemRICH output for the sub-pathway-based analysis.

| Cluster name                                         | Cluster size | p-value     | q-value   | Altered metabolites | Increased | Decreased | Increased ratio | Altered ratio |
|------------------------------------------------------|--------------|-------------|-----------|---------------------|-----------|-----------|-----------------|---------------|
| Androgenic Steroids                                  | 18           | 0.000000019 | 0.0000021 | 11                  | 0         | 11        | 0               | 0.6           |
| Drug - Analgesics, Anesthetics                       | 20           | 0.00000055  | 0.00003   | 10                  | 2         | 8         | 0.1             | 0.5           |
| Fatty Acid Metabolism (Acyl Choline)                 | 7            | 0.000019    | 0.0007    | 6                   | 0         | 6         | 0               | 0.9           |
| Ceramide                                             | 12           | 0.000041    | 0.0011    | 7                   | 7         | 0         | 0.6             | 0.6           |
| Dipeptide                                            | 6            | 0.0046      | 0.1       | 4                   | 0         | 4         | 0               | 0.7           |
| Fatty Acid Metabolism(Acyl Carnitine)                | 39           | 0.0076      | 0.14      | 8                   | 3         | 5         | 0.08            | 0.2           |
| Sphingomyelin                                        | 12           | 0.032       | 0.5       | 4                   | 4         | 0         | 0.3             | 0.3           |
| Corticosteroids                                      | 4            | 0.056       | 0.77      | 2                   | 0         | 2         | 0               | 0.5           |
| Gamma-glutamyl/Amino Acid                            | 16           | 0.15        | 1         | 5                   | 5         | 0         | 0.3             | 0.3           |
| Fatty Acid, Monohydroxy                              | 19           | 0.15        | 1         | 4                   | 0         | 4         | 0               | 0.2           |
| Food Component,Plant                                 | 49           | 0.28        | 1         | 10                  | 2         | 8         | 0.04            | 0.2           |
| Tryptophan Metabolism                                | 19           | 0.36        | 1         | 4                   | 1         | 3         | 0.05            | 0.2           |
| Alanine and Aspartate Metabolism                     | 10           | 0.55        | 1         | 2                   | 2         | 0         | 0.2             | 0.2           |
| Acetylated Peptides                                  | 4            | 1           | 1         | 1                   | 1         | 0         | 0.2             | 0.2           |
| Aminosugar Metabolism                                | 5            | 1           | 1         | 1                   | 1         | 0         | 0.2             | 0.2           |
| Ascorbate and Aldarate Metabolism                    | 3            | 1           | 1         | 1                   | 1         | 0         | 0.3             | 0.3           |
| Bacterial/Fungal                                     | 3            | 1           | 1         | 0                   | 0         | 0         | 0               | 0             |
| Benzoate Metabolism                                  | 21           | 1           | 1         | 1                   | 1         | 0         | 0.05            | 0.05          |
| CE Ester                                             | 26           | 1           | 1         | 7                   | 7         | 0         | 0.3             | 0.3           |
| Chemical                                             | 23           | 1           | 1         | 1                   | 0         | 1         | 0               | 0.04          |
| Creatine Metabolism                                  | 3            | 1           | 1         | 0                   | 0         | 0         | 0               | 0             |
| DAG Ester                                            | 58           | 1           | 1         | 0                   | 0         | 0         | 0               | 0             |
| Dihydroceramide                                      | 13           | 1           | 1         | 1                   | 1         | 0         | 0.08            | 0.08          |
| Drug - Cardiovascular                                | 12           | 1           | 1         | 1                   | 1         | 0         | 0.08            | 0.08          |
| Drug - Gastrointestinal                              | 4            | 1           | 1         | 0                   | 0         | 0         | 0               | 0             |
| Drug - Neurological                                  | 5            | 1           | 1         | 0                   | 0         | 0         | 0               | 0             |
| Drug - Psychoactive                                  | 12           | 1           | 1         | 1                   | 1         | 0         | 0.08            | 0.08          |
| Drug - Respiratory                                   | 4            | 1           | 1         | 2                   | 2         | 0         | 0.5             | 0.5           |
| Drug - Topical Agents                                | 3            | 1           | 1         | 0                   | 0         | 0         | 0               | 0             |
| Endocannabinoid                                      | 5            | 1           | 1         | 0                   | 0         | 0         | 0               | 0             |
| Ester                                                | 26           | 1           | 1         | 2                   | 0         | 2         | 0               | 0.08          |
| Fatty Acid Metabolism (also BCAA Metabolism)         | 4            | 1           | 1         | 1                   | 1         | 0         | 0.2             | 0.2           |
| Fatty Acid Metabolism(Acyl Glycine)                  | 3            | 1           | 1         | 0                   | 0         | 0         | 0               | 0             |
| Fatty Acid, Amino                                    | 3            | 1           | 1         | 0                   | 0         | 0         | 0               | 0             |
| Fatty Acid, Branched                                 | 5            | 1           | 1         | 0                   | 0         | 0         | 0               | 0             |
| Fatty Acid, Dicarboxylate                            | 28           | 1           | 1         | 3                   | 2         | 1         | 0.07            | 0.1           |
| Fatty Acid, Dihydroxy                                | 6            | 1           | 1         | 0                   | 0         | 0         | 0               | 0             |
| Fibrinogen Cleavage Peptide                          | 7            | 1           | 1         | 0                   | 0         | 0         | 0               | 0             |
| Fructose, Mannose and Galactose Metabolism           | 4            | 1           | 1         | 0                   | 0         | 0         | 0               | 0             |
| Glutamate Metabolism                                 | 14           | 1           | 1         | 1                   | 1         | 0         | 0.07            | 0.07          |
| Glutathione Metabolism                               | 7            | 1           | 1         | 2                   | 0         | 2         | 0               | 0.3           |
| Glycerolipid Metabolism                              | 3            | 1           | 1         | 0                   | 0         | 0         | 0               | 0             |
| Glycine, Serine and Threonine Metabolism             | 11           | 1           | 1         | 2                   | 0         | 2         | 0               | 0.2           |
| Glycolysis, Gluconeogenesis, and Pyruvate Metabolism | 6            | 1           | 1         | 0                   | 0         | 0         | 0               | 0             |
| Hemoglobin and Porphyrin Metabolism                  | 5            | 1           | 1         | 0                   | 0         | 0         | 0               | 0             |
| Hexosylceramide                                      | 12           | 1           | 1         | 3                   | 3         | 0         | 0.2             | 0.2           |
| Histidine Metabolism                                 | 15           | 1           | 1         | 1                   | 1         | 0         | 0.07            | 0.07          |
| Lactosylceramide                                     | 12           | 1           | 1         | 2                   | 2         | 0         | 0.2             | 0.2           |
| Leucine, Isoleucine and Valine Metabolism            | 31           | 1           | 1         | 1                   | 1         | 0         | 0.03            | 0.03          |
| Long Chain Fatty Acid                                | 13           | 1           | 1         | 1                   | 0         | 1         | 0               | 0.08          |
| LPC Ester                                            | 18           | 1           | 1         | 0                   | 0         | 0         | 0               | 0             |
| LPE Ester                                            | 17           | 1           | 1         | 1                   | 1         | 0         | 0.06            | 0.06          |
| Lysine Metabolism                                    | 15           | 1           | 1         | 1                   | 1         | 0         | 0.07            | 0.07          |
| Lysophospholipid                                     | 6            | 1           | 1         | 0                   | 0         | 0         | 0               | 0             |
| Medium Chain Fatty Acid                              | 9            | 1           | 1         | 1                   | 0         | 1         | 0               | 0.1           |
| Methionine, Cysteine, SAM and Taurine Metabolism     | 22           | 1           | 1         | 2                   | 1         | 1         | 0.05            | 0.09          |
| Monounsaturated FFA                                  | 6            | 1           | 1         | 0                   | 0         | 0         | 0               | 0             |
| Nicotinate and Nicotinamide Metabolism               | 7            | 1           | 1         | 1                   | 0         | 1         | 0               | 0.1           |
| PC Ester                                             | 103          | 1           | 1         | 2                   | 1         | 1         | 0.01            | 0.02          |
| PE Ester                                             | 61           | 1           | 1         | 0                   | 0         | 0         | 0               | 0             |
| PE Ether                                             | 20           | 1           | 1         | 0                   | 0         | 0         | 0               | 0             |
| PE Plasmalogen                                       | 46           | 1           | 1         | 0                   | 0         | 0         | 0               | 0             |
| Pentose Metabolism                                   | 7            | 1           | 1         | 0                   | 0         | 0         | 0               | 0             |
| Phenylalanine Metabolism                             | 8            | 1           | 1         | 1                   | 0         | 1         | 0               | 0.1           |
| Phospholipid Metabolism                              | 6            | 1           | 1         | 0                   | 0         | 0         | 0               | 0             |
| PI Ester                                             | 28           | 1           | 1         | 0                   | 0         | 0         | 0               | 0             |
| Polyamine Metabolism                                 | 6            | 1           | 1         | 0                   | 0         | 0         | 0               | 0             |
| Polysaturated Fatty Acid (n3 and n6)                 | 15           | 1           | 1         | 1                   | 0         | 1         | 0               | 0.06          |
| Polysaturated FFA (PUFA)                             | 10           | 1           | 1         | 0                   | 0         | 0         | 0               | 0             |
| Pregnenolone Steroids                                | 6            | 1           | 1         | 0                   | 0         | 0         | 0               | 0             |
| Primary Bile Acid Metabolism                         | 9            | 1           | 1         | 2                   | 0         | 2         | 0               | 0.2           |
| Progestin Steroids                                   | 6            | 1           | 1         | 0                   | 0         | 0         | 0               | 0             |
| Purine Metabolism, (Hypo)Xanthine/Inosine containing | 6            | 1           | 1         | 0                   | 0         | 0         | 0               | 0             |
| Purine Metabolism, Adenine containing                | 4            | 1           | 1         | 0                   | 0         | 0         | 0               | 0             |
| Pyrimidine Metabolism, Cytidine containing           | 5            | 1           | 1         | 0                   | 0         | 0         | 0               | 0             |
| Pyrimidine Metabolism, Orotate containing            | 3            | 1           | 1         | 0                   | 0         | 0         | 0               | 0             |
| Pyrimidine Metabolism, Uracil containing             | 11           | 1           | 1         | 0                   | 0         | 0         | 0               | 0             |
| Saturated FFA                                        | 9            | 1           | 1         | 1                   | 0         | 1         | 0               | 0.1           |
| Secondary Bile Acid Metabolism                       | 20           | 1           | 1         | 4                   | 2         | 2         | 0.1             | 0.2           |
| Sphingosines                                         | 3            | 1           | 1         | 0                   | 0         | 0         | 0               | 0             |
| Sterol                                               | 7            | 1           | 1         | 1                   | 0         | 1         | 0               | 0.1           |
| TAG Ester_ FA12:0                                    | 17           | 1           | 1         | 0                   | 0         | 0         | 0               | 0             |
| TAG Ester_ FA14:0                                    | 32           | 1           | 1         | 0                   | 0         | 0         | 0               | 0             |
| TAG Ester_ FA14:1                                    | 12           | 1           | 1         | 0                   | 0         | 0         | 0               | 0             |
| TAG Ester_ FA15:0                                    | 14           | 1           | 1         | 0                   | 0         | 0         | 0               | 0             |
| TAG Ester_ FA16:0                                    | 65           | 1           | 1         | 0                   | 0         | 0         | 0               | 0             |
| TAG Ester_ FA16:1                                    | 37           | 1           | 1         | 0                   | 0         | 0         | 0               | 0             |
| TAG Ester_ FA17:0                                    | 13           | 1           | 1         | 0                   | 0         | 0         | 0               | 0             |
| TAG Ester_ FA18:0                                    | 37           | 1           | 1         | 0                   | 0         | 0         | 0               | 0             |
| TAG Ester_ FA18:1                                    | 67           | 1           | 1         | 0                   | 0         | 0         | 0               | 0             |
| TAG Ester_ FA18:2                                    | 55           | 1           | 1         | 0                   | 0         | 0         | 0               | 0             |
| TAG Ester_ FA18:3                                    | 29           | 1           | 1         | 1                   | 1         | 0         | 0.03            | 0.03          |
| TAG Ester_ FA20:0                                    | 9            | 1           | 1         | 0                   | 0         | 0         | 0               | 0             |
| TAG Ester_ FA20:1                                    | 12           | 1           | 1         | 0                   | 0         | 0         | 0               | 0             |
| TAG Ester_ FA20:2                                    | 12           | 1           | 1         | 0                   | 0         | 0         | 0               | 0             |
| TAG Ester_ FA20:3                                    | 16           | 1           | 1         | 0                   | 0         | 0         | 0               | 0             |
| TAG Ester_ FA20:4                                    | 31           | 1           | 1         | 0                   | 0         | 0         | 0               | 0             |
| TAG Ester_ FA20:5                                    | 13           | 1           | 1         | 0                   | 0         | 0         | 0               | 0             |
| TAG Ester_ FA22:1                                    | 4            | 1           | 1         | 0                   | 0         | 0         | 0               | 0             |
| TAG Ester_ FA22:4                                    | 9            | 1           | 1         | 0                   | 0         | 0         | 0               | 0             |
| TAG Ester_ FA22:5                                    | 15           | 1           | 1         | 0                   | 0         | 0         | 0               | 0             |
| TAG Ester_ FA22:6                                    | 19           | 1           | 1         | 0                   | 0         | 0         | 0               | 0             |
| TGA Cycle                                            | 9            | 1           | 1         | 0                   | 0         | 0         | 0               | 0             |
| Tobacco Metabolite                                   | 6            | 1           | 1         | 1                   | 0         | 1         | 0               | 0.2           |
| Tocopherol Metabolism                                | 4            | 1           | 1         | 0                   | 0         | 0         | 0               | 0             |
| Tyrosine Metabolism                                  | 13           | 1           | 1         | 1                   | 1         | 0         | 0.08            | 0.08          |
| Urea cycle; Arginine and Proline Metabolism          | 20           | 1           | 1         | 1                   | 1         | 0         | 0.05            | 0.05          |
| Vitamin A Metabolism                                 | 6            | 1           | 1         | 0                   | 0         | 0         | 0               | 0             |
| Xanthine Metabolism                                  | 15           | 1           | 1         | 0                   | 0         | 0         | 0               | 0             |

Table S10: Averaged fold change of the median for each of the 94 sub-pathways.

| Super-pathway                     | Sub-pathway                                          | Averaged fold change of the median |
|-----------------------------------|------------------------------------------------------|------------------------------------|
| Amino Acid                        | Alanine and Aspartate Metabolism                     | 0.95                               |
|                                   | Creatine Metabolism                                  | 0.98                               |
|                                   | Glutamate Metabolism                                 | 0.95                               |
|                                   | Glutathione Metabolism                               | 1.14                               |
|                                   | Glycine, Serine and Threonine Metabolism             | 1.05                               |
|                                   | Guanidino and Acetamido Metabolism                   | 0.95                               |
|                                   | Histidine Metabolism                                 | 1.04                               |
|                                   | Leucine, Isoleucine and Valine Metabolism            | 0.97                               |
|                                   | Lysine Metabolism                                    | 0.98                               |
|                                   | Methionine, Cysteine, SAM and Taurine Metabolism     | 1.02                               |
|                                   | Phenylalanine Metabolism                             | 0.99                               |
|                                   | Polyamine Metabolism                                 | 0.98                               |
|                                   | Tryptophan Metabolism                                | 1.10                               |
|                                   | Tyrosine Metabolism                                  | 0.98                               |
| Carbohydrate                      | Urea cycle; Arginine and Proline Metabolism          | 0.96                               |
|                                   | Advanced Glycation End-product                       | 0.94                               |
|                                   | Aminosugar Metabolism                                | 1.01                               |
|                                   | Disaccharides and Oligosaccharides                   | 1.19                               |
|                                   | Fructose, Mannose and Galactose Metabolism           | 1.03                               |
|                                   | Glycogen Metabolism                                  | 0.89                               |
|                                   | Glycolysis, Gluconeogenesis, and Pyruvate Metabolism | 1.04                               |
| Cofactors and Vitamins            | Pentose Metabolism                                   | 1.01                               |
|                                   | Ascorbate and Aldarate Metabolism                    | 0.89                               |
|                                   | Hemoglobin and Porphyrin Metabolism                  | 0.93                               |
|                                   | Nicotinate and Nicotinamide Metabolism               | 1.09                               |
|                                   | Pantothenate and CoA Metabolism                      | 1.13                               |
|                                   | Riboflavin Metabolism                                | 1.28                               |
|                                   | Tocopherol Metabolism                                | 1.01                               |
| Energy                            | Vitamin A Metabolism                                 | 1.01                               |
|                                   | Vitamin B6 Metabolism                                | 1.41                               |
| Lipid                             | Oxidative Phosphorylation                            | 1.09                               |
|                                   | TCA Cycle                                            | 0.97                               |
|                                   | Androgenic Steroids                                  | 1.66                               |
|                                   | Carnitine Metabolism                                 | 1.06                               |
|                                   | Ceramide PEs                                         | 0.92                               |
|                                   | Corticosteroids                                      | 1.36                               |
|                                   | Endocannabinoid                                      | 0.93                               |
|                                   | Fatty Acid Metabolism (Acyl Choline)                 | 1.93                               |
|                                   | Fatty Acid Metabolism (Acyl Glutamine)               | 0.77                               |
|                                   | Fatty Acid Metabolism (also BCAA Metabolism)         | 0.87                               |
|                                   | Fatty Acid Metabolism (Acyl Carnitine)               | 1.10                               |
|                                   | Fatty Acid Metabolism (Acyl Glycine)                 | 0.87                               |
|                                   | Fatty Acid Synthesis                                 | 0.85                               |
|                                   | Fatty Acid, Amino                                    | 0.99                               |
|                                   | Fatty Acid, Branched                                 | 1.30                               |
|                                   | Fatty Acid, Dicarboxylate                            | 1.10                               |
|                                   | Fatty Acid, Dihydroxy                                | 1.06                               |
|                                   | Fatty Acid, Monohydroxy                              | 1.11                               |
|                                   | Glycerolipid Metabolism                              | 0.93                               |
|                                   | Inositol Metabolism                                  | 0.94                               |
|                                   | Ketone Bodies                                        | 1.08                               |
|                                   | Long Chain Fatty Acid                                | 1.07                               |
|                                   | Lysophospholipid                                     | 0.92                               |
|                                   | Medium Chain Fatty Acid                              | 1.20                               |
|                                   | Mevalonate Metabolism                                | 0.96                               |
|                                   | Phosphatidylglycerol (PG)                            | 1.02                               |
|                                   | Phosphatidylserine (PS)                              | 0.81                               |
|                                   | Phospholipid Metabolism                              | 1.05                               |
|                                   | Polysaturated Fatty Acid (n3 and n6)                 | 1.18                               |
|                                   | Pregnenolone Steroids                                | 1.29                               |
|                                   | Primary Bile Acid Metabolism                         | 1.39                               |
|                                   | Progestin Steroids                                   | 1.42                               |
|                                   | Secondary Bile Acid Metabolism                       | 1.24                               |
|                                   | Short Chain Fatty Acid                               | 1.36                               |
|                                   | Sphingolipid Synthesis                               | 1.06                               |
|                                   | Sphingosines                                         | 1.04                               |
|                                   | Sterol                                               | 1.05                               |
| Nucleotide                        | Purine Metabolism, (Hypo)Xanthine/Inosine containing | 1.13                               |
|                                   | Purine Metabolism, Adenine containing                | 1.00                               |
|                                   | Purine Metabolism, Guanine containing                | 1.07                               |
|                                   | Pyrimidine Metabolism, Cytidine containing           | 1.47                               |
|                                   | Pyrimidine Metabolism, Orotate containing            | 0.90                               |
|                                   | Pyrimidine Metabolism, Thymine containing            | 0.92                               |
|                                   | Pyrimidine Metabolism, Uracil containing             | 1.06                               |
| Partially Characterized Molecules | Partially Characterized Molecules                    | 1.05                               |
| Peptide                           | Acetylated Peptides                                  | 0.89                               |
|                                   | Dipeptide                                            | 1.49                               |
|                                   | Fibrinogen Cleavage Peptide                          | 1.34                               |
| Xenobiotics                       | Gamma-glutamyl Amino Acid                            | 0.92                               |
|                                   | Bacteria/Fungal                                      | 1.37                               |
|                                   | Benzoate Metabolism                                  | 1.10                               |
|                                   | Chemical                                             | 1.06                               |
|                                   | Drug - Topical Agents                                | 1.09                               |
|                                   | Food Component/Plant                                 | 1.21                               |
|                                   | Xanthine Metabolism                                  | 1.03                               |
|                                   | Drug - Analgesics, Anesthetics                       | ND                                 |
|                                   | Drug - Antibiotic                                    | ND                                 |
|                                   | Drug - Cardiovascular                                | ND                                 |
|                                   | Drug - Gastrointestinal                              | ND                                 |
|                                   | Drug - Metabolic                                     | ND                                 |
|                                   | Drug - Neurological                                  | ND                                 |
|                                   | Drug - Psychoactive                                  | ND                                 |
|                                   | Drug - Respiratory                                   | ND                                 |
|                                   | Tobacco Metabolite                                   | ND                                 |

ND stands for Not Determined. Fold change represents controls/patients. Fold changes in red highlight the sub-pathways with higher abundance in patients compared to controls.

Table S11: Statistical analysis of Monoacylglycerols measured in Germain et al. (2018).

| Super-pathway | Sub-pathway        | Metabolite                        | HMDB ID   | Fold change | <i>p</i> -value |
|---------------|--------------------|-----------------------------------|-----------|-------------|-----------------|
| Lipids        | Monoacyl-glycerols | 1-palmitoleoylglycerol (16:1)*    | HMDB11565 | 1.2         | 0.74            |
|               |                    | 1-oleoylglycerol (18:1)           | HMDB11567 | 1           | 0.47            |
|               |                    | 1-linoleoylglycerol (18:2)        | NA        | 1.3         | 0.06            |
|               |                    | 1-linolenoylglycerol (18:3)       | HMDB11569 | 2           | 0.03            |
|               |                    | 2-oleoylglycerol (18:1)           | HMDB11537 | 1.3         | 0.37            |
|               |                    | 2-linoleoylglycerol (18:2)        | HMDB11538 | 2.1         | 0.01            |
|               |                    | 1-dihomo-linolenylglycerol (20:3) | NA        | 1           | 0.35            |
|               |                    | 1-arachidonylglycerol (20:4)      | HMDB11549 | 1.2         | 0.59            |

HMDB stands for Human Metabolome Database.

Fold change of median represents controls/patients.

NA stands for Not Assigned.
